# Supplementary material for: 2D holey cobalt sulfide nanosheets derived from metal–organic frameworks for high-rate sodium ion batteries with superior cyclability
Source: Royal Society of Chemistry journal article supplement (doi:10.1039/c8ta05612a), 2018-01-01
Supplement: c8ta05612a1.pdf [file c8ta05612a1.pdf]

## Electronic Supplementary Material

### **2D holey cobalt sulfide nanosheets derived from metal organic frameworks for high-rate sodium ion batteries with superior cyclability**

Yanfeng Dong,<sup>a</sup> Wen Shi,<sup>b</sup> Pengfei Lu,<sup>a</sup> Jieqiong Qin,<sup>ac</sup> Shuanghao Zheng,<sup>acd</sup> Bingsen Zhang,<sup>b</sup> Xinhe Bao<sup>ad</sup> and Zhong-Shuai Wu<sup>\*a</sup>

a Dalian National Laboratory for Clean Energy, Dalian Institute of Chemical Physics, Chinese Academy of Sciences, 457 Zhongshan Road, Dalian 116023, China.

b Shenyang National Laboratory for Materials Science, Institute of Metal Research, Chinese Academy of Sciences, 72 Wenhua Road, Shenyang 110016, China

c University of Chinese Academy of Sciences, 19 A Yuquan Rd, Shijingshan District, Beijing, 100049, China

d State Key Laboratory of Catalysis, Dalian Institute of Chemical Physics, Chinese Academy of Sciences, 457 Zhongshan Road, Dalian 116023, China

\* E-mail: wuzs@dicp.ac.cn

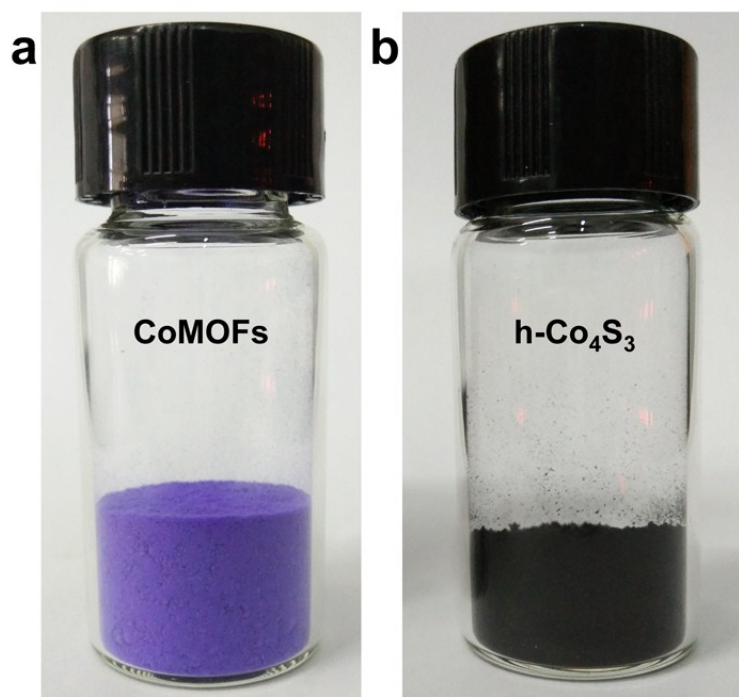

**Figure S1.** Photos of (a) CoMOFs and (b) h-Co<sub>4</sub>S<sub>3</sub> samples.

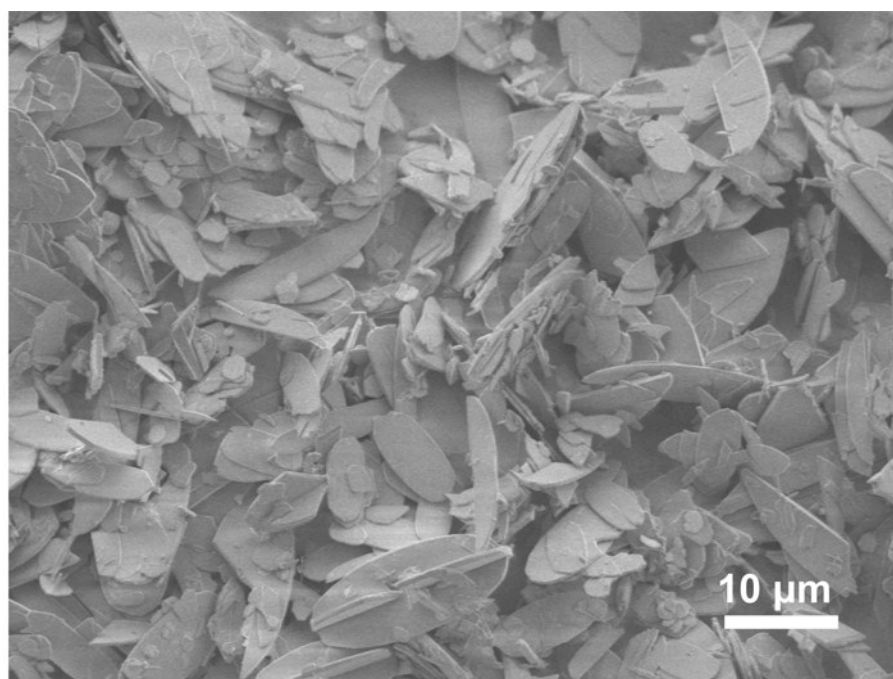

**Figure S2.** SEM image of CoMOFs.

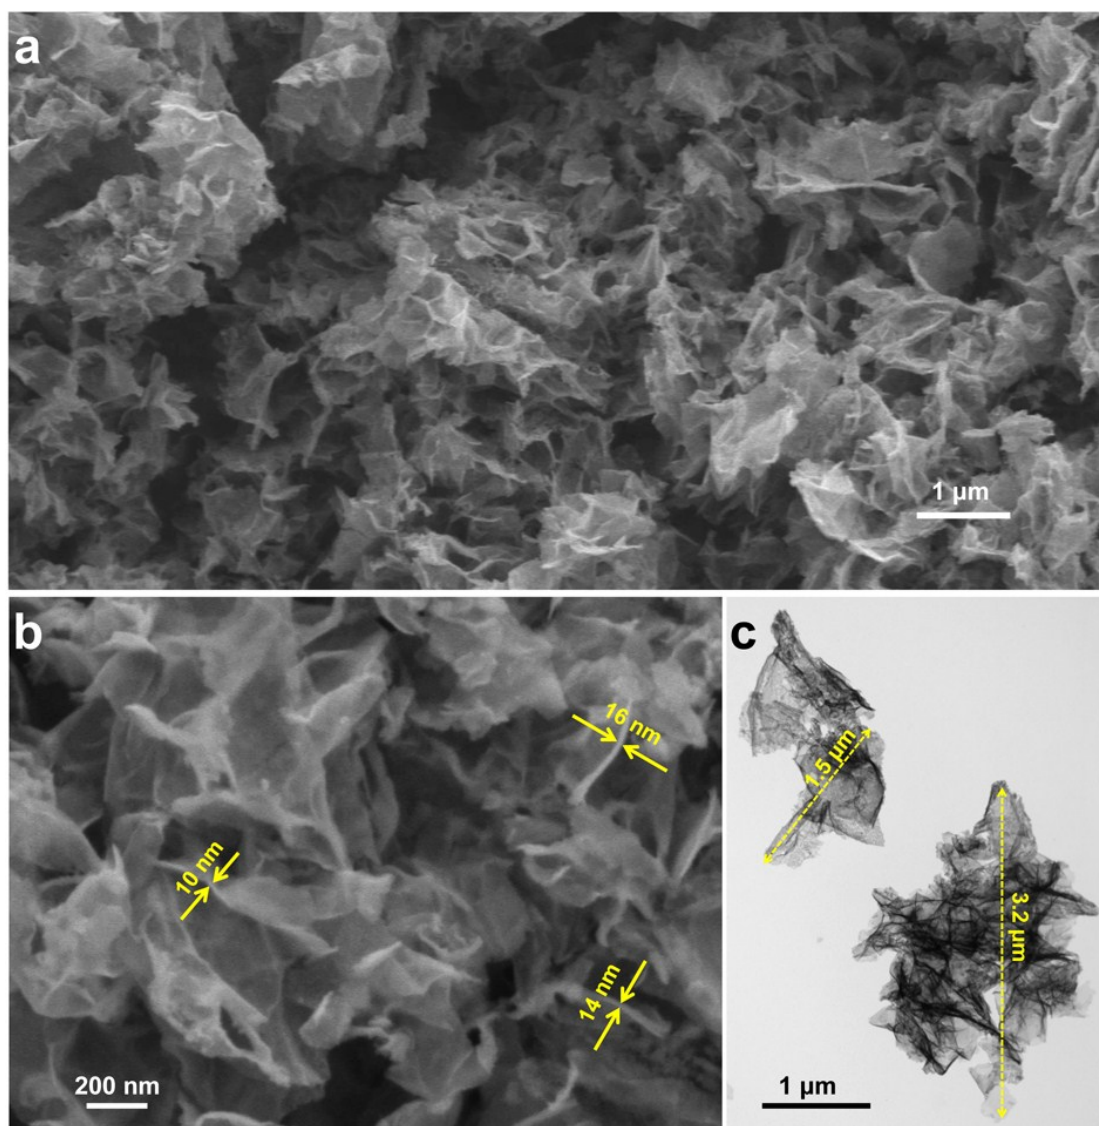

**Figure S3.** (a) Low-magnification and (b) high-magnification SEM images, and (c) TEM image of  $\text{CoS}_x$  nanosheets.

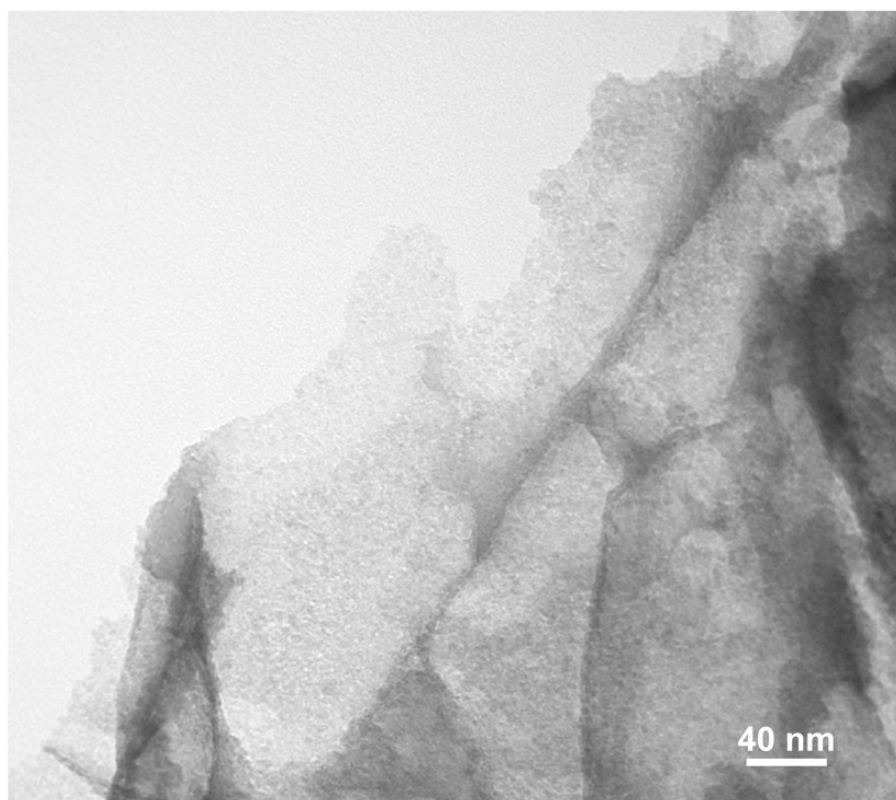

**Figure S4.** TEM image of  $\text{CoS}_x$  nanosheets.

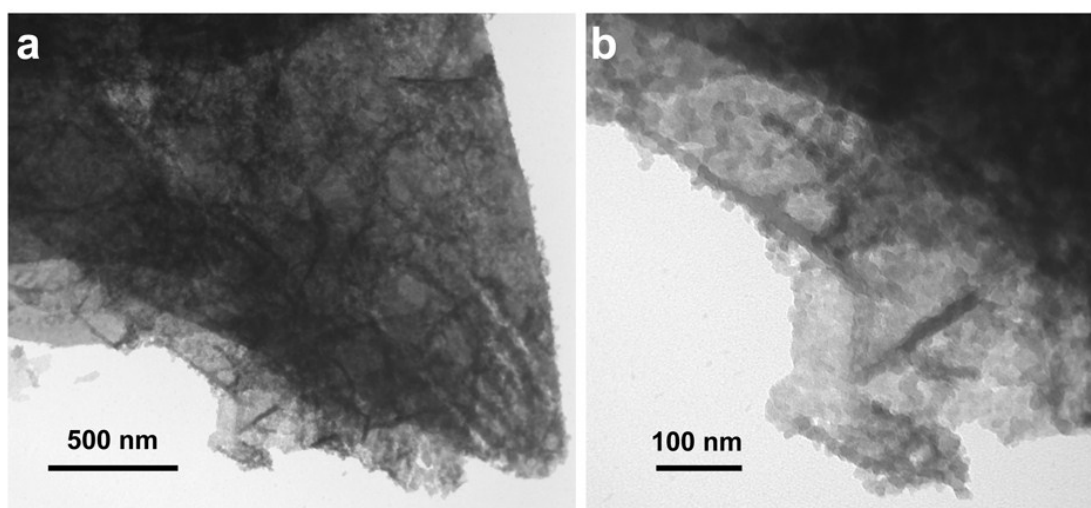

**Figure S5.** (a) TEM and (b) HRTEM images of the  $\text{CoS}_x$  products obtained after a sulfuration reaction time of 10 min.

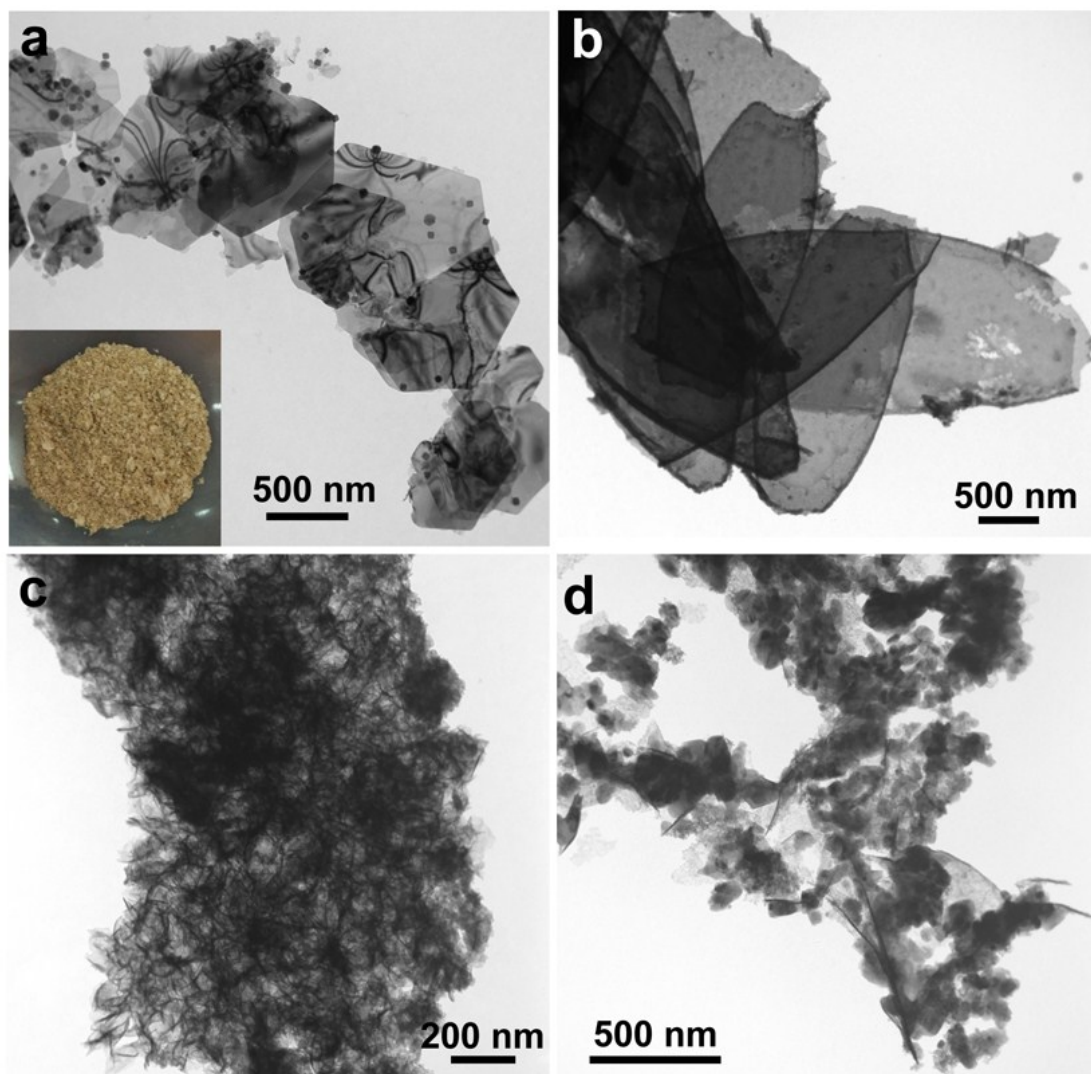

**Figure S6.** (a) TEM image of  $\text{Co(OH)}_2$  nanosheets synthesized at 85 °C in  $\text{H}_2\text{O}$  without TAA. Inset: the photograph of  $\text{Co(OH)}_2$  nanosheets. (b,c) TEM images of  $\text{CoS}_x$  products prepared in alcohol (b) and mixed reaction solution of  $\text{H}_2\text{O}$  (40 mL) and alcohol (140 mL) (c). (d) TEM image of  $\text{CoS}_x$  product prepared with the sulfuration reagent of  $\text{Na}_2\text{S}$ . The CoMOFs were unstable at 85 °C in  $\text{H}_2\text{O}$  without TAA, and would release the  $\text{Co}^{2+}$  ions, resulting in the generation of  $\text{Co(OH)}_2$  nanoplates (Figure S6a). While in alcohol, the growth of  $\text{CoS}_x$  would surpass the dissolution of the CoMOFs, therefore, the sulfuration reaction between  $\text{S}^{2-}$  ions from TAA and  $\text{Co}^{2+}$  ions from CoMOFs occurred at the surface of CoMOFs. With the

processing of the sulfuration reaction, the hollow leaf-like nanostructures were obtained (Figure S6b). It is noted that the kinetics between the dissolution of the CoMOFs and the growth of the  $\text{CoS}_x$  could be well controlled by employing mixed reaction solution of  $\text{H}_2\text{O}$  and alcohol, and ultra-thin wrinkle  $\text{CoS}_x$  nanosheets were prepared (Figure S6c). While  $\text{Na}_2\text{S}$  was used as sulfuration agent instead of TAA, the rate of the  $\text{CoS}_x$  growth would be too fast due to the excessed release of  $\text{S}^{2-}$  ions, thereby the product displayed the existence of particles on nanosheets (Figure S6d).

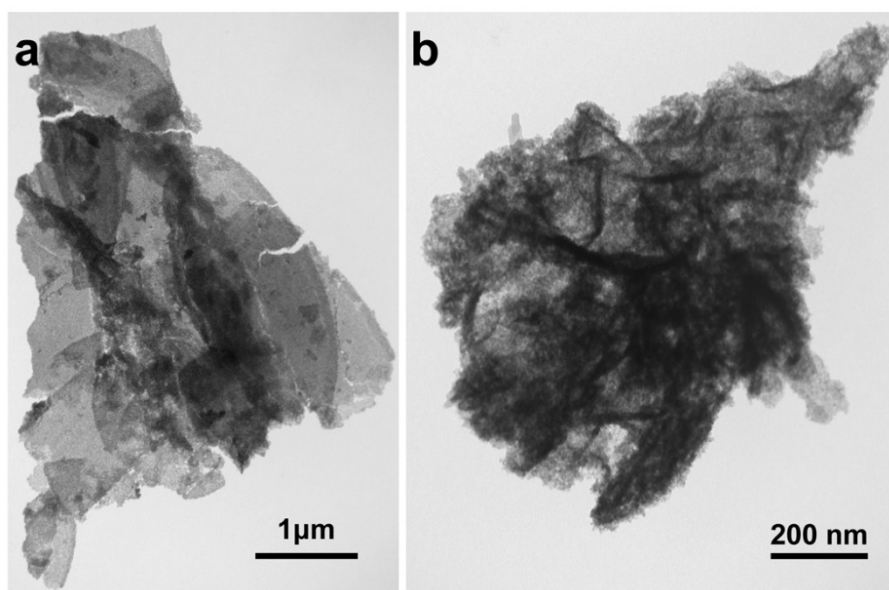

**Figure S7.** TEM images of (a) Zn MOFs derived product and (b) ZnCo MOFs derived product synthesized under the same procedures with  $\text{CoS}_x$  nanosheets except for the use of ZnMOFs and ZnCoMOFs precursors, indicating the unique roles of CoMOFs precursor in forming large-area  $\text{CoS}_x$  nanosheets



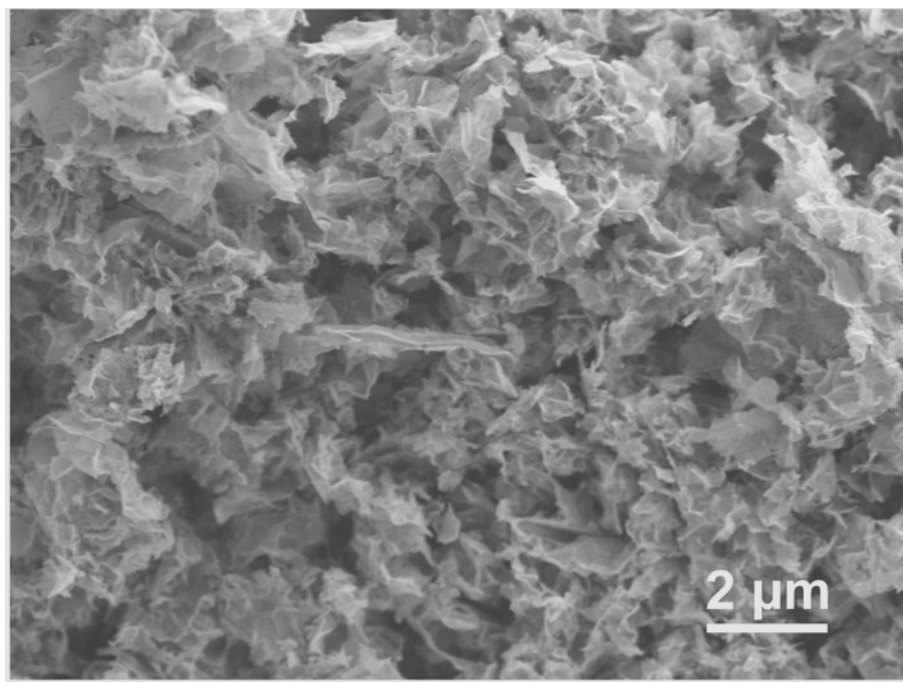

**Figure S8.** Low-magnification SEM image of h-Co<sub>4</sub>S<sub>3</sub> nanosheets.

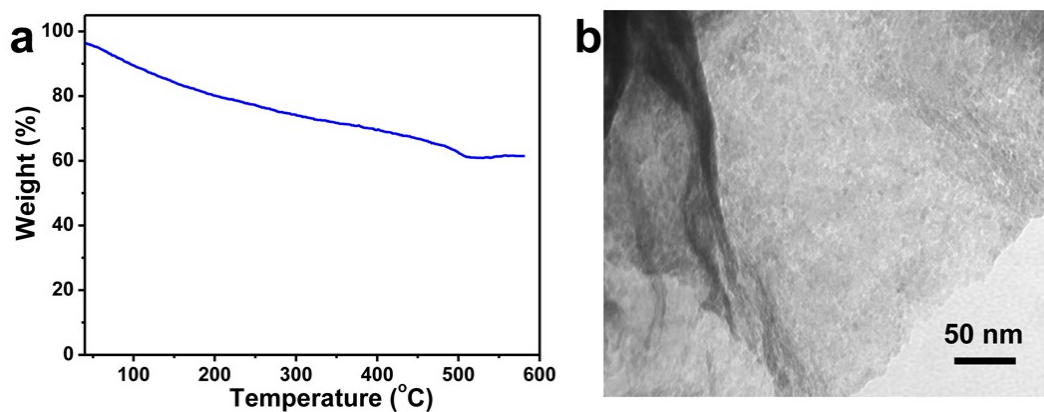

**Figure S9.** (a) Thermogravimetric analysis of CoS<sub>x</sub> nanosheets conducted in nitrogen atmosphere. (b) TEM image of the sample (detonated as CoS<sub>x</sub>-350 °C) synthesized by annealing treatment of CoS<sub>x</sub> nanosheets at lower temperature of 350 °C in nitrogen atmosphere.

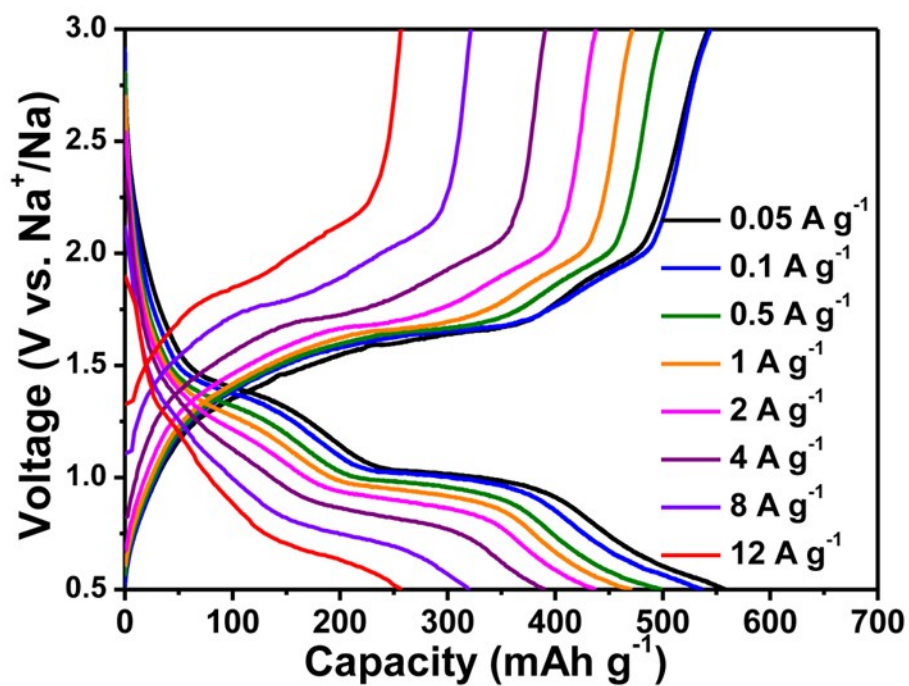

**Figure S10.** Galvanostatic charge and discharge profiles of h-Co<sub>4</sub>S<sub>3</sub> anode cycled at different current densities from 0.05 to 12 A g<sup>-1</sup>.

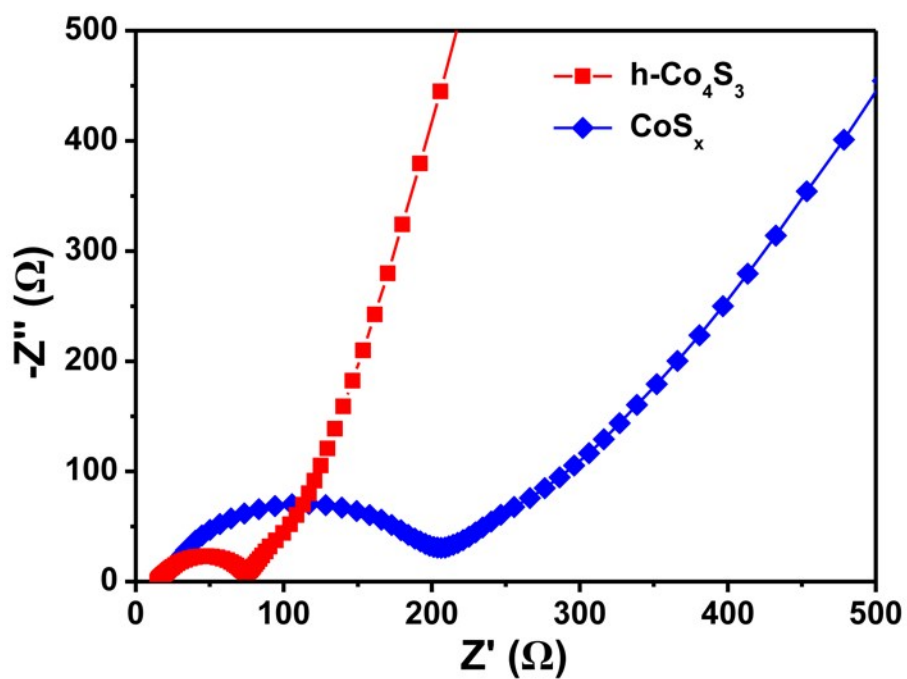

**Figure S11.** Electrochemical impedance spectroscopies of h-Co<sub>4</sub>S<sub>3</sub> and CoS<sub>x</sub> electrodes.



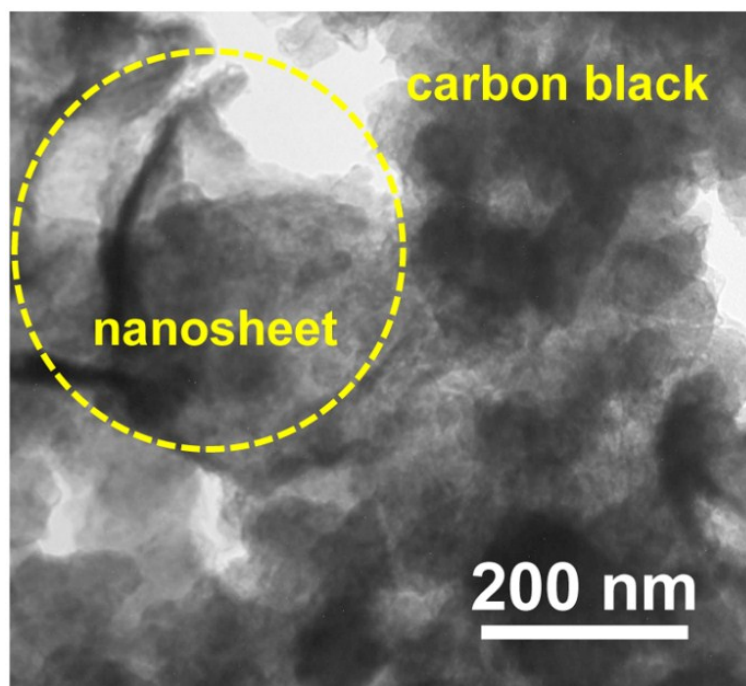

**Figure S12.** TEM image of cycled h-Co<sub>4</sub>S<sub>3</sub>, showing the nanosheets marked in the yellow circle were well kept without pulverization.

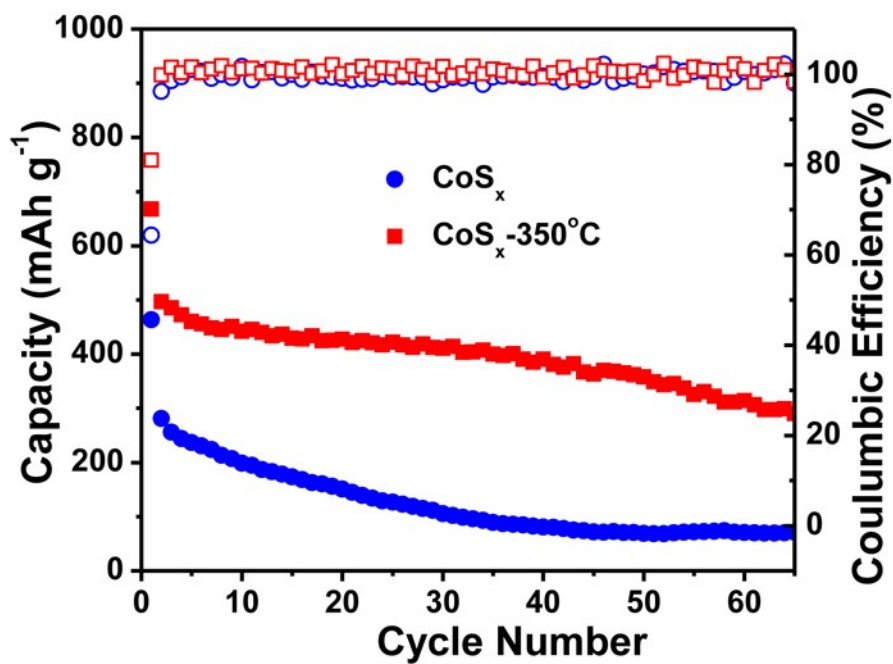

**Figure S13.** Cycling performance of CoS<sub>x</sub> and CoS<sub>x</sub>-350 °C electrodes in DGM-based electrolyte tested at 0.1 A g<sup>-1</sup>.

**Table S1** Comparison of the lateral size and thickness of MOFs derived nanosheets in this work and other reported Co based nanosheets

| Materials                                        | Preparation method                                        | Lateral size (nm)            | Thickness (nm) | Reference        |
|--------------------------------------------------|-----------------------------------------------------------|------------------------------|----------------|------------------|
| <b>CoS<sub>x</sub> nanosheet</b>                 | sulfuration of CoMOFs with TAA                            | micrometer scale(~1000-3000) | <16            | <b>This work</b> |
| <b>h-Co<sub>4</sub>S<sub>3</sub> nanosheet</b>   | annealing treatment                                       | micrometer scale(~1000-3000) | <30            | <b>This work</b> |
| CoS nanosheet                                    | sulfuration of Co(OH) <sub>2</sub> with Na <sub>2</sub> S | <200                         | <25            | Ref.[1]          |
| CoS <sub>x</sub> nanosheet                       | electrodeposition                                         | <50                          | <20            | Ref.[2]          |
| nickel cobalt sulfide nanosheet                  | electrodeposition                                         | <200                         | <25            | Ref.[3]          |
| NiCo <sub>2</sub> S <sub>4</sub> nanosheets      | sulfuration of NiCo-precursor with Na <sub>2</sub> S      | <500                         | <50            | Ref.[4]          |
| NiCo-layered double hydroxides                   | etching of ZIF67 with Ni(NO <sub>3</sub> ) <sub>2</sub>   | <300                         | <50            | Ref.[5]          |
| Co(OH) <sub>2</sub> flower-like nanosheets       | hydrothermal treatment of MOF                             | ~1000                        | <30            | Ref.[6]          |
| CoNi hydroxide nanosheets                        | in situ decomposition of Co-based acetate hydroxide MOFs  | <100                         | <3             | Ref.[7]          |
| porous Co <sub>3</sub> O <sub>4</sub> nanosheets | pyrolysis process of Co-based MOF nanoplates in air       | micrometer scale             | ~30            | Ref.[8]          |
| holey Co <sub>3</sub> O <sub>4</sub> nanosheets  | GO templated synthesis                                    | micrometer scale             | ~30            | Ref.[9]          |

## REFERENCES

- [1] H. Hu, Bu Y. Guan and Xiong W. Lou, *Chem.*, 2016, **1**, 102-113.
- [2] W. Fu, C. Zhao, W. Han, Y. Liu, H. Zhao, Y. Ma and E. Xie, *J. Mater. Chem. A*, 2015, **3**, 10492-10497.
- [3] W. Chen, C. Xia and H. N. Alshareef, *ACS Nano*, 2014, **8**, 9531-9541.
- [4] L. Shen, J. Wang, G. Xu, H. Li, H. Dou and X. Zhang, *Adv. Energy Mater.*, 2015, **5**, 1400977.
- [5] Z. Jiang, Z. Li, Z. Qin, H. Sun, X. Jiao and D. Chen, *Nanoscale*, 2013, **5**, 11770-11775.
- [6] C. Cui, J. Wang, Z. Luo, J. Wang, C. Li and Z. Li, *Electrochim. Acta*, 2018, **273**, 327-334.
- [7] K. He, Z. Cao, R. Liu, Y. Miao, H. Ma and Y. Ding, *Nano Res.*, 2016, **9**, 1856-1865.
- [8] A. Li, M. Zhong, W. Shuang, C. -P. Wang, J. Liu, Z. Chang and X.-H. Bu, *Inorg. Chem. Front.*, 2018, DOI:10.1039/C8QI00196K
- [9] L. Peng, P. Xiong, L. Ma, Y. Yuan, Y. Zhu, D. Chen, X. Luo, J. Lu and K. Amine, G. Yu, *Nat. Commun.*, 2017, **8**, 15139.
